# Supplementary material
Source: ML conference proceedings conference paper supplement (https://openreview.net/forum?id=w7LxAZfDfv)
Supplement: supplementary_material [file attachment]

## 1 Supplementary Material

2 **More results on ShapeNet-55/34.** In order to have an intuitive evaluation of reconstructed results,  
 3 we also provide qualitative evaluations in Fig. 1 compared with results generated from the baseline.  
 4 We can clearly see the results not only have better numerical performance (Tab. 3) but also the model  
 5 trained with InfoCD did a better job in reconstructing the surface areas and preserving the details  
 6 with less noise.

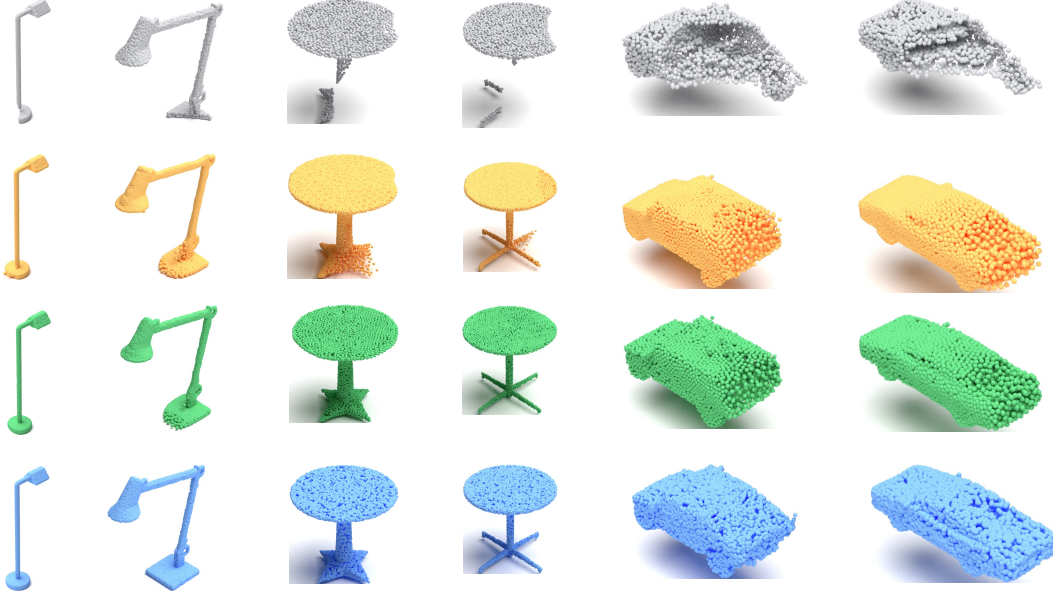

Figure 1: Visual comparison of point cloud completion results on ShapeNet-55 dataset. **Row-1:** Inputs of incomplete point clouds. **Row-2:** Outputs of SeedFormer with CD. **Row-3:** Outputs of SeedFormer with InfoCD. **Row-4:** Ground truth.

7 We report complete results of our method on ShapeNet-55 in Tab. 3 and results of novel categories  
 8 on ShapeNet-34 in Tab. 1. We also provide the complete results on ShapeNet-34 in Tab. 2 of two  
 9 popular baselines. The models are tested under three difficulty levels: simple, moderate and hard.  
 10 For ShapeNet-55, we can see that with the help of InfoCD, the baseline achieves best scores on all  
 11 categories. We also provide the complete results on ShapeNet-55 in Tab. 4 of two popular baselines.

Table 1: Detailed results for the novel objects on ShapeNet-34. *S.*, *M.* and *H.* stand for the simple, moderate and hard settings.

| CD- $\ell_2$ ( $\times 1000$ ) | PCN [1] |      |       | TopNet [2] |      |       | PFNet [3] |       |       | GRNet [4] |      |       | SeedFormer [5] |      |      | InfoCD + S. |             |             |
|--------------------------------|---------|------|-------|------------|------|-------|-----------|-------|-------|-----------|------|-------|----------------|------|------|-------------|-------------|-------------|
|                                | S.      | M.   | H.    | S.         | M.   | H.    | S.        | M.    | H.    | S.        | M.   | H.    | S.             | M.   | H.   | S.          | M.          | H.          |
| bag                            | 2.48    | 2.46 | 3.94  | 2.08       | 1.95 | 4.36  | 3.88      | 4.42  | 9.67  | 1.47      | 1.88 | 3.45  | 0.49           | 0.82 | 1.45 | <b>0.41</b> | <b>0.75</b> | <b>1.40</b> |
| basket                         | 2.79    | 2.51 | 4.78  | 2.46       | 2.11 | 5.18  | 4.47      | 4.55  | 14.46 | 1.78      | 1.94 | 4.18  | 0.60           | 0.85 | 1.98 | <b>0.55</b> | <b>0.80</b> | <b>1.81</b> |
| birdhouse                      | 3.53    | 3.47 | 5.31  | 3.17       | 2.97 | 5.89  | 3.9       | 4.65  | 9.88  | 1.89      | 2.34 | 5.16  | 0.72           | 1.19 | 2.31 | <b>0.67</b> | <b>1.02</b> | <b>2.18</b> |
| bowl                           | 2.66    | 2.35 | 3.97  | 2.46       | 2.16 | 4.84  | 4.35      | 5.0   | 14.59 | 1.77      | 1.97 | 3.9   | 0.60           | 0.77 | 1.50 | <b>0.51</b> | <b>0.65</b> | <b>1.42</b> |
| camera                         | 4.84    | 5.3  | 8.03  | 4.24       | 4.43 | 8.11  | 6.78      | 8.04  | 13.91 | 2.31      | 3.38 | 7.2   | 0.89           | 1.77 | 3.75 | <b>0.82</b> | <b>1.67</b> | <b>3.63</b> |
| can                            | 1.95    | 1.89 | 5.21  | 2.02       | 1.7  | 5.82  | 2.95      | 3.47  | 23.02 | 1.53      | 1.8  | 3.08  | 0.56           | 0.89 | 1.57 | <b>0.47</b> | <b>0.72</b> | <b>1.35</b> |
| cap                            | 7.21    | 7.14 | 10.94 | 4.68       | 4.23 | 9.17  | 14.11     | 14.86 | 28.23 | 3.29      | 4.87 | 13.02 | 0.50           | 1.34 | 5.19 | <b>0.38</b> | <b>1.12</b> | <b>4.23</b> |
| keyboard                       | 1.07    | 1.0  | 1.23  | 0.79       | 0.77 | 1.55  | 1.13      | 1.16  | 2.58  | 0.73      | 0.77 | 1.11  | 0.32           | 0.41 | 0.60 | <b>0.23</b> | <b>0.31</b> | <b>0.52</b> |
| dishwasher                     | 2.45    | 2.09 | 3.53  | 2.51       | 1.77 | 4.72  | 3.44      | 3.78  | 9.31  | 1.79      | 1.7  | 3.27  | 0.63           | 0.78 | 1.44 | <b>0.55</b> | <b>0.72</b> | <b>1.35</b> |
| earphone                       | 7.88    | 6.59 | 16.53 | 5.33       | 4.83 | 11.67 | 20.31     | 23.21 | 39.49 | 4.29      | 4.16 | 10.3  | 1.18           | 2.78 | 6.71 | <b>1.05</b> | <b>2.21</b> | <b>6.77</b> |
| helmet                         | 6.15    | 6.41 | 9.16  | 4.89       | 4.86 | 8.73  | 8.78      | 10.07 | 21.2  | 3.06      | 4.38 | 10.27 | 1.10           | 2.27 | 4.78 | <b>1.01</b> | <b>2.17</b> | <b>4.76</b> |
| mailbox                        | 2.74    | 2.68 | 4.31  | 2.35       | 2.2  | 4.91  | 5.2       | 5.33  | 10.94 | 1.52      | 1.9  | 4.33  | 0.56           | 0.99 | 2.06 | <b>0.47</b> | <b>0.87</b> | <b>1.95</b> |
| microphone                     | 4.36    | 4.65 | 8.46  | 3.03       | 3.2  | 7.15  | 6.39      | 7.99  | 19.41 | 2.29      | 3.23 | 8.41  | 0.80           | 1.61 | 4.21 | <b>0.61</b> | <b>1.56</b> | <b>4.02</b> |
| microwaves                     | 2.59    | 2.35 | 4.47  | 2.67       | 2.12 | 5.41  | 3.89      | 4.08  | 9.01  | 1.74      | 1.81 | 3.82  | 0.64           | 0.83 | 1.69 | <b>0.61</b> | <b>0.75</b> | <b>1.51</b> |
| pillow                         | 2.09    | 2.16 | 3.54  | 2.08       | 2.05 | 4.01  | 4.15      | 4.29  | 12.01 | 1.43      | 1.69 | 3.43  | 0.43           | 0.66 | 1.45 | <b>0.38</b> | <b>0.52</b> | <b>1.35</b> |
| printer                        | 3.28    | 3.6  | 5.56  | 2.9        | 2.96 | 6.07  | 5.38      | 5.94  | 10.29 | 1.82      | 2.41 | 5.09  | 0.69           | 1.25 | 2.33 | <b>0.62</b> | <b>1.17</b> | <b>2.15</b> |
| remote                         | 0.95    | 1.08 | 1.58  | 0.89       | 0.89 | 2.28  | 1.51      | 1.75  | 6.0   | 0.82      | 1.02 | 1.29  | 0.27           | 0.42 | 0.61 | <b>0.21</b> | <b>0.34</b> | <b>0.50</b> |
| rocket                         | 1.39    | 1.22 | 2.01  | 1.14       | 0.96 | 2.03  | 1.84      | 1.51  | 4.01  | 0.97      | 0.79 | 1.6   | 0.28           | 0.51 | 1.02 | <b>0.17</b> | <b>0.41</b> | <b>0.95</b> |
| skateboard                     | 1.97    | 1.78 | 2.45  | 1.23       | 1.2  | 2.01  | 2.43      | 2.53  | 4.25  | 0.93      | 1.07 | 1.83  | 0.35           | 0.56 | 0.92 | <b>0.27</b> | <b>0.51</b> | <b>0.81</b> |
| tower                          | 2.37    | 2.4  | 4.35  | 2.2        | 2.17 | 5.47  | 3.38      | 4.15  | 13.11 | 1.35      | 1.8  | 3.85  | 0.51           | 0.92 | 1.87 | <b>0.46</b> | <b>0.81</b> | <b>1.72</b> |
| washer                         | 2.77    | 2.52 | 4.64  | 2.63       | 2.14 | 6.57  | 4.53      | 4.27  | 9.23  | 1.83      | 1.97 | 5.28  | 0.61           | 0.87 | 1.94 | <b>0.51</b> | <b>0.72</b> | <b>1.83</b> |
| mean                           | 3.22    | 3.13 | 5.43  | 2.65       | 2.46 | 5.52  | 5.37      | 5.95  | 13.55 | 1.84      | 2.23 | 4.95  | 0.61           | 1.07 | 2.35 | <b>0.54</b> | <b>1.01</b> | <b>2.18</b> |

Table 2: More detailed results for the novel objects on ShapeNet-34. *S.*, *M.* and *H.* stand for the simple, moderate and hard settings.

| CD- $\ell_2(\times 1000)$ | FoldingNet [6] |      |       | InfoCD + FoldingNet |             |              | PoinTr [7] |      |       | InfoCD + PoinTr |             |             |
|---------------------------|----------------|------|-------|---------------------|-------------|--------------|------------|------|-------|-----------------|-------------|-------------|
|                           | S.             | M.   | H.    | S.                  | M.          | H.           | S.         | M.   | H.    | S.              | M.          | H.          |
| bag                       | 2.15           | 2.27 | 3.99  | <b>1.75</b>         | <b>1.98</b> | <b>3.47</b>  | 0.96       | 1.34 | 2.08  | <b>0.52</b>     | <b>0.85</b> | <b>1.59</b> |
| basket                    | 2.37           | 2.2  | 4.87  | <b>1.90</b>         | <b>1.94</b> | <b>4.46</b>  | 1.04       | 1.4  | 2.9   | <b>0.59</b>     | <b>0.84</b> | <b>2.06</b> |
| birdhouse                 | 3.27           | 3.15 | 5.62  | <b>2.81</b>         | <b>2.84</b> | <b>5.18</b>  | 1.22       | 1.79 | 3.45  | <b>0.75</b>     | <b>1.24</b> | <b>2.58</b> |
| bowl                      | 2.61           | 2.3  | 4.55  | <b>2.18</b>         | <b>2.01</b> | <b>4.08</b>  | 1.05       | 1.32 | 2.4   | <b>0.60</b>     | <b>0.77</b> | <b>1.47</b> |
| camera                    | 4.4            | 4.78 | 7.85  | <b>4.01</b>         | <b>4.45</b> | <b>7.36</b>  | 1.63       | 2.67 | 4.97  | <b>1.00</b>     | <b>1.95</b> | <b>4.26</b> |
| can                       | 1.95           | 1.73 | 5.86  | <b>1.52</b>         | <b>1.41</b> | <b>1.38</b>  | 0.8        | 1.17 | 2.85  | <b>0.51</b>     | <b>0.83</b> | <b>1.81</b> |
| cap                       | 6.07           | 5.98 | 11.49 | <b>5.63</b>         | <b>5.67</b> | <b>11.98</b> | 1.4        | 2.74 | 8.35  | <b>0.57</b>     | <b>1.30</b> | <b>5.42</b> |
| keyboard                  | 0.98           | 0.96 | 1.35  | <b>0.53</b>         | <b>0.64</b> | <b>0.84</b>  | 0.43       | 0.45 | 0.63  | <b>0.29</b>     | <b>0.34</b> | <b>0.54</b> |
| dishwasher                | 2.09           | 1.8  | 4.55  | <b>1.55</b>         | <b>1.45</b> | <b>4.09</b>  | 0.93       | 1.05 | 2.04  | <b>0.55</b>     | <b>0.73</b> | <b>1.49</b> |
| earphone                  | 6.86           | 6.96 | 12.77 | <b>6.43</b>         | <b>6.62</b> | <b>12.26</b> | 2.03       | 5.1  | 10.69 | <b>1.05</b>     | <b>2.49</b> | <b>7.91</b> |
| helmet                    | 4.86           | 5.04 | 8.86  | <b>4.41</b>         | <b>4.71</b> | <b>8.34</b>  | 1.86       | 3.3  | 6.96  | <b>1.11</b>     | <b>2.40</b> | <b>5.88</b> |
| mailbox                   | 2.2            | 2.29 | 4.49  | <b>1.83</b>         | <b>1.94</b> | <b>4.02</b>  | 1.03       | 1.47 | 3.34  | <b>0.53</b>     | <b>0.94</b> | <b>2.21</b> |
| microphone                | 2.92           | 3.27 | 8.54  | <b>2.51</b>         | <b>2.92</b> | <b>8.01</b>  | 1.25       | 2.27 | 5.47  | <b>0.83</b>     | <b>1.52</b> | <b>4.00</b> |
| microwaves                | 2.29           | 2.12 | 5.17  | <b>1.83</b>         | <b>1.81</b> | <b>1.75</b>  | 1.01       | 1.18 | 2.14  | <b>0.63</b>     | <b>0.81</b> | <b>1.75</b> |
| pillow                    | 2.07           | 2.11 | 3.73  | <b>1.64</b>         | <b>1.82</b> | <b>3.22</b>  | 0.92       | 1.24 | 2.39  | <b>0.48</b>     | <b>0.69</b> | <b>1.59</b> |
| printer                   | 3.02           | 3.23 | 5.53  | <b>2.61</b>         | <b>2.97</b> | <b>5.02</b>  | 1.18       | 1.76 | 3.1   | <b>0.71</b>     | <b>1.27</b> | <b>2.52</b> |
| remote                    | 0.89           | 0.92 | 1.85  | <b>0.42</b>         | <b>0.61</b> | <b>1.38</b>  | 0.44       | 0.58 | 0.78  | <b>0.26</b>     | <b>0.38</b> | <b>0.57</b> |
| rocket                    | 1.28           | 1.09 | 2.0   | <b>0.81</b>         | <b>0.77</b> | <b>1.51</b>  | 0.39       | 0.72 | 1.39  | <b>0.30</b>     | <b>0.53</b> | <b>1.01</b> |
| skateboard                | 1.53           | 1.42 | 1.99  | <b>1.16</b>         | <b>1.10</b> | <b>1.48</b>  | 0.52       | 0.8  | 1.31  | <b>0.36</b>     | <b>0.60</b> | <b>0.88</b> |
| tower                     | 2.25           | 2.25 | 4.74  | <b>1.80</b>         | <b>1.93</b> | <b>4.22</b>  | 0.82       | 1.35 | 2.48  | <b>0.50</b>     | <b>0.93</b> | <b>1.98</b> |
| washer                    | 2.58           | 2.34 | 5.5   | <b>1.12</b>         | <b>2.07</b> | <b>5.02</b>  | 1.04       | 1.39 | 2.73  | <b>0.60</b>     | <b>0.87</b> | <b>2.08</b> |
| mean                      | 2.79           | 2.77 | 5.49  | <b>2.42</b>         | <b>2.49</b> | <b>5.01</b>  | 1.05       | 1.67 | 3.45  | <b>0.61</b>     | <b>1.06</b> | <b>2.55</b> |

Table 3: Detailed results on ShapeNet-55. *S.*, *M.* and *H.* stand for the simple, moderate and hard settings.

| CD- $\ell_2(\times 1000)$ | PCN [1] |      |      | TopNet [2] |      |      | PFNet [3] |      |       | GRNet [4] |      |      | SeedFormer [5] |      |      | InfoCD + S. |             |             |
|---------------------------|---------|------|------|------------|------|------|-----------|------|-------|-----------|------|------|----------------|------|------|-------------|-------------|-------------|
|                           | S.      | M.   | H.   | S.         | M.   | H.   | S.        | M.   | H.    | S.        | M.   | H.   | S.             | M.   | H.   | S.          | M.          | H.          |
| airplane                  | 0.9     | 0.89 | 1.32 | 1.02       | 0.99 | 1.48 | 1.35      | 1.44 | 2.69  | 0.87      | 0.87 | 1.27 | 0.23           | 0.35 | 0.61 | <b>0.22</b> | <b>0.33</b> | <b>0.58</b> |
| trash bin                 | 2.16    | 2.18 | 5.15 | 2.51       | 2.32 | 5.03 | 4.03      | 3.39 | 9.63  | 1.69      | 2.01 | 3.48 | 0.23           | 0.35 | 0.61 | <b>0.22</b> | <b>0.33</b> | <b>0.58</b> |
| bag                       | 2.11    | 2.04 | 4.44 | 2.36       | 2.23 | 4.21 | 3.63      | 3.66 | 7.6   | 1.41      | 1.7  | 2.97 | 0.43           | 0.67 | 1.28 | <b>0.42</b> | <b>0.65</b> | <b>1.20</b> |
| basket                    | 2.21    | 2.1  | 4.55 | 2.62       | 2.43 | 5.71 | 4.74      | 3.88 | 8.47  | 1.65      | 1.84 | 3.15 | 0.65           | 0.83 | 1.54 | <b>0.63</b> | <b>0.81</b> | <b>1.46</b> |
| bathtub                   | 2.11    | 2.09 | 3.94 | 2.49       | 2.25 | 4.33 | 3.64      | 3.5  | 5.74  | 1.46      | 1.73 | 2.73 | 0.52           | 0.82 | 1.45 | <b>0.51</b> | <b>0.78</b> | <b>1.38</b> |
| bed                       | 2.86    | 3.07 | 5.54 | 3.13       | 3.1  | 5.71 | 4.44      | 5.36 | 9.14  | 1.64      | 2.03 | 3.7  | 0.63           | 0.91 | 1.89 | <b>0.62</b> | <b>0.88</b> | <b>1.80</b> |
| bench                     | 1.31    | 1.24 | 2.14 | 1.56       | 1.39 | 2.4  | 2.17      | 2.16 | 4.11  | 1.03      | 1.09 | 1.71 | 0.32           | 0.42 | 0.84 | <b>0.31</b> | <b>0.40</b> | <b>0.80</b> |
| birdhouse                 | 3.29    | 3.53 | 6.69 | 3.73       | 3.98 | 6.8  | 3.96      | 5.0  | 9.66  | 1.87      | 2.4  | 4.71 | 0.76           | 1.30 | 2.46 | <b>0.76</b> | <b>1.26</b> | <b>2.35</b> |
| bookshelf                 | 2.7     | 2.7  | 4.61 | 3.11       | 2.87 | 4.87 | 3.19      | 3.47 | 5.72  | 1.42      | 1.71 | 2.78 | 0.57           | 0.84 | 1.57 | <b>0.56</b> | <b>0.82</b> | <b>1.52</b> |
| bottle                    | 1.25    | 1.43 | 4.61 | 1.56       | 1.66 | 4.02 | 2.37      | 2.89 | 10.03 | 1.05      | 1.44 | 2.67 | 0.31           | 0.63 | 1.21 | <b>0.31</b> | <b>0.60</b> | <b>1.17</b> |
| bowl                      | 2.05    | 1.83 | 3.66 | 2.33       | 1.98 | 4.82 | 4.3       | 3.97 | 8.76  | 1.6       | 1.77 | 2.99 | 0.56           | 0.65 | 1.18 | <b>0.54</b> | <b>0.64</b> | <b>1.14</b> |
| bus                       | 1.2     | 1.14 | 2.08 | 1.32       | 1.21 | 2.29 | 2.06      | 1.88 | 3.75  | 1.06      | 1.16 | 1.48 | 0.42           | 0.55 | 0.73 | <b>0.41</b> | <b>0.54</b> | <b>0.72</b> |
| cabinet                   | 1.6     | 1.49 | 3.47 | 1.91       | 1.65 | 3.36 | 2.72      | 2.37 | 4.73  | 1.27      | 1.41 | 2.09 | 0.57           | 0.69 | 1.05 | <b>0.56</b> | <b>0.67</b> | <b>1.05</b> |
| camera                    | 4.05    | 4.54 | 8.27 | 4.75       | 4.98 | 9.24 | 6.57      | 8.04 | 13.11 | 2.14      | 3.15 | 6.09 | 0.83           | 1.68 | 3.45 | <b>0.80</b> | <b>1.65</b> | <b>3.44</b> |
| can                       | 2.02    | 2.28 | 6.48 | 2.67       | 2.4  | 5.5  | 5.65      | 4.05 | 16.29 | 1.58      | 2.11 | 3.81 | 0.58           | 1.03 | 1.79 | <b>0.56</b> | <b>1.00</b> | <b>1.75</b> |
| cap                       | 1.82    | 1.76 | 4.2  | 3.0        | 2.69 | 5.59 | 10.92     | 9.04 | 20.3  | 1.17      | 1.37 | 3.05 | 0.33           | 0.45 | 1.18 | <b>0.33</b> | <b>0.42</b> | <b>1.02</b> |
| car                       | 1.48    | 1.47 | 2.6  | 1.71       | 1.65 | 3.17 | 2.06      | 2.1  | 3.43  | 1.29      | 1.48 | 2.14 | 0.65           | 0.86 | 1.17 | <b>0.64</b> | <b>0.84</b> | <b>1.12</b> |
| cellphone                 | 0.8     | 0.79 | 1.71 | 1.01       | 0.96 | 1.8  | 1.25      | 1.37 | 3.65  | 0.82      | 0.91 | 1.18 | 0.31           | 0.40 | 0.54 | <b>0.30</b> | <b>0.38</b> | <b>0.52</b> |
| chair                     | 1.7     | 1.81 | 3.34 | 1.97       | 2.04 | 3.59 | 2.94      | 3.48 | 6.34  | 1.24      | 1.56 | 2.73 | 0.41           | 0.65 | 1.38 | <b>0.40</b> | <b>0.63</b> | <b>1.31</b> |
| clock                     | 2.1     | 2.01 | 3.98 | 2.48       | 2.16 | 4.03 | 3.15      | 3.27 | 6.03  | 1.46      | 1.66 | 2.67 | 0.53           | 0.74 | 1.35 | <b>0.51</b> | <b>0.71</b> | <b>1.29</b> |
| keyboard                  | 0.82    | 0.82 | 1.04 | 0.88       | 0.83 | 1.15 | 0.83      | 1.06 | 1.97  | 0.74      | 0.81 | 1.09 | 0.28           | 0.36 | 0.45 | <b>0.28</b> | <b>0.34</b> | <b>0.45</b> |
| dishwasher                | 1.93    | 1.66 | 4.39 | 2.43       | 1.74 | 4.64 | 4.57      | 3.23 | 6.39  | 1.43      | 1.59 | 2.53 | 0.56           | 0.69 | 1.30 | <b>0.55</b> | <b>0.66</b> | <b>1.31</b> |
| display                   | 1.56    | 1.66 | 3.26 | 1.84       | 1.85 | 3.48 | 2.27      | 2.83 | 5.52  | 1.13      | 1.38 | 2.29 | 0.39           | 0.59 | 1.10 | <b>0.38</b> | <b>0.56</b> | <b>1.05</b> |
| earphone                  | 3.13    | 2.94 | 7.56 | 4.36       | 4.47 | 8.36 | 15.07     | 17.5 | 33.37 | 1.78      | 2.18 | 5.33 | 0.64           | 1.04 | 2.75 | <b>0.59</b> | <b>0.96</b> | <b>2.43</b> |
| faucet                    | 3.21    | 3.48 | 7.52 | 3.61       | 3.59 | 7.25 | 5.68      | 6.79 | 14.29 | 1.81      | 2.32 | 4.91 | 0.55           | 1.15 | 2.63 | <b>0.49</b> | <b>1.00</b> | <b>2.63</b> |
| filecabinet               | 2.02    | 1.97 | 4.14 | 2.41       | 2.12 | 4.12 | 3.72      | 3.57 | 7.13  | 1.46      | 1.71 | 2.89 | 0.63           | 0.84 | 1.49 | <b>0.61</b> | <b>0.81</b> | <b>1.48</b> |
| guitar                    | 0.42    | 0.38 | 1.23 | 0.57       | 0.47 | 1.42 | 0.74      | 0.89 | 5.41  | 0.44      | 0.48 | 0.76 | 0.13           | 0.19 | 0.32 | <b>0.12</b> | <b>0.18</b> | <b>0.32</b> |
| helmet                    | 3.76    | 4.18 | 7.53 | 4.36       | 4.55 | 7.73 | 9.55      | 8.41 | 15.44 | 2.33      | 3.18 | 6.03 | 0.79           | 1.52 | 3.61 | <b>0.78</b> | <b>1.48</b> | <b>3.32</b> |
| jar                       | 2.57    | 2.82 | 6.0  | 3.03       | 3.17 | 7.03 | 5.44      | 5.56 | 11.87 | 1.72      | 2.37 | 4.37 | 0.63           | 1.13 | 2.36 | <b>0.63</b> | <b>1.12</b> | <b>2.24</b> |
| knife                     | 0.94    | 0.62 | 1.37 | 0.84       | 0.68 | 1.44 | 2.11      | 1.53 | 3.89  | 0.72      | 0.66 | 0.96 | 0.15           | 0.28 | 0.45 | <b>0.15</b> | <b>0.26</b> | <b>0.43</b> |
| lamp                      | 3.1     | 3.45 | 7.02 | 3.03       | 3.39 | 8.15 | 6.82      | 7.61 | 14.22 | 1.68      | 2.43 | 5.17 | 0.45           | 1.06 | 2.67 | <b>0.42</b> | <b>1.03</b> | <b>2.60</b> |
| laptop                    | 0.75    | 0.79 | 1.59 | 0.8        | 0.85 | 1.66 | 1.04      | 1.21 | 2.46  | 0.83      | 0.87 | 1.28 | 0.32           | 0.37 | 0.55 | <b>0.31</b> | <b>0.36</b> | <b>0.54</b> |
| loudspeaker               | 2.5     | 2.45 | 5.08 | 3.1        | 2.76 | 5.32 | 4.32      | 4.19 | 7.6   | 1.75      | 2.08 | 3.45 | 0.67           | 1.01 | 1.80 | <b>0.65</b> | <b>0.98</b> | <b>1.75</b> |
| mailbox                   | 1.66    | 1.74 | 5.18 | 2.16       | 2.1  | 5.1  | 3.82      | 4.2  | 10.51 | 1.15      | 1.59 | 3.42 | 0.30           | 0.67 | 2.04 | <b>0.31</b> | <b>0.63</b> | <b>1.96</b> |
| microphone                | 3.44    | 3.9  | 8.52 | 2.83       | 3.49 | 6.87 | 6.58      | 7.56 | 16.74 | 2.09      | 2.76 | 5.7  | 0.62           | 1.61 | 3.66 | <b>0.56</b> | <b>1.39</b> | <b>3.19</b> |
| microwaves                | 2.2     | 2.01 | 4.65 | 2.65       | 2.15 | 5.07 | 4.63      | 3.94 | 6.52  | 1.51      | 1.72 | 2.76 | 0.63           | 0.79 | 1.47 | <b>0.62</b> | <b>0.77</b> | <b>1.42</b> |
| motorbike                 | 2.03    | 2.01 | 3.13 | 2.29       | 2.25 | 3.54 | 2.17      | 2.48 | 5.09  | 1.38      | 1.52 | 2.26 | 0.68           | 0.96 | 1.44 | <b>0.66</b> | <b>0.93</b> | <b>1.40</b> |
| mug                       | 2.45    | 2.48 | 5.17 | 2.89       | 2.56 | 5.43 | 4.76      | 4.3  | 8.37  | 1.75      | 2.16 | 3.79 | 0.79           | 1.03 | 2.06 | <b>0.75</b> | <b>1.03</b> | <b>2.04</b> |
| piano                     | 2.64    | 2.74 | 4.83 | 2.99       | 2.89 | 5.64 | 4.57      | 5.26 | 9.26  | 1.53      | 1.82 | 3.21 | 0.62           | 0.87 | 1.79 | <b>0.59</b> | <b>0.82</b> | <b>1.66</b> |
| pillow                    | 1.85    | 1.81 | 3.68 | 2.31       | 2.26 | 4.19 | 4.21      | 3.82 | 7.89  | 1.42      | 1.67 | 3.04 | 0.48           | 0.75 | 1.41 | <b>0.45</b> | <b>0.67</b> | <b>1.27</b> |
| pistol                    | 1.25    | 1.17 | 2.65 | 1.5        | 1.3  | 2.62 | 2.27      | 2.09 | 7.2   | 1.11      | 1.06 | 1.76 | 0.37           | 0.56 | 0.96 | <b>0.36</b> | <b>0.54</b> | <b>0.92</b> |
| flowerpot                 | 3.32    | 3.39 | 6.04 | 3.61       | 3.45 | 6.28 | 4.83      | 5.51 | 10.68 | 2.02      | 2.48 | 4.19 | 0.93           | 1.30 | 2.32 | <b>0.90</b> | <b>1.26</b> | <b>2.23</b> |
| remote                    | 0.99    | 0.97 | 2.04 | 1.14       | 1.17 | 2.16 | 1.74      | 2.37 | 4.61  | 0.89      | 1.05 | 1.29 | 0.29           | 0.46 | 0.62 | <b>0.29</b> | <b>0.44</b> | <b>0.64</b> |
| rifle                     | 0.98    | 0.8  | 1.31 | 0.98       | 0.86 | 1.46 | 1.72      | 1.45 | 3.02  | 0.83      | 0.77 | 1.16 | 0.27           | 0.41 | 0.66 | <b>0.25</b> | <b>0.39</b> | <b>0.62</b> |
| rocket                    | 1.05    | 1.04 | 1.87 | 1.04       | 1.0  | 1.93 | 1.65      | 1.61 | 3.82  | 0.78      | 0.92 | 1.44 | 0.21           | 0.46 | 0.83 | <b>0.19</b> | <b>0.42</b> | <b>0.80</b> |
| skateboard                | 1.04    | 0.94 | 1.68 | 1.08       | 1.05 | 1.84 | 1.43      | 1.6  | 3.09  | 0.82      | 0.87 | 1.24 | 0.23           | 0.32 | 0.62 | <b>0.22</b> | <b>0.30</b> | <b>0.50</b> |
| sofa                      | 1.65    | 1.61 | 2.92 | 1.93       | 1.76 | 3.39 | 2.65      | 2.53 | 4.84  | 1.35      | 1.45 | 2.32 | 0.50           | 0.62 | 1.02 | <b>0.48</b> | <b>0.60</b> | <b>0.97</b> |
| stove                     | 2.07    | 2.02 | 4.72 | 2.44       | 2.16 | 4.84 | 4.03      | 3.71 | 7.15  | 1.46      | 1.72 | 3.22 | 0.59           | 0.87 | 1.49 | <b>0.58</b> | <b>0.84</b> | <b>1.46</b> |
| table                     | 1.56    | 1.5  | 3.36 | 1.78       | 1.65 | 3.21 | 3.03      | 3.11 | 5.74  | 1.15      | 1.33 | 2.33 | 0.41           | 0.58 | 1.18 | <b>0.40</b> | <b>0.55</b> | <b>1.11</b> |
| telephone                 | 0.8     | 0.8  | 1.67 | 1.02       | 0.95 | 1.78 | 1.3       | 1.47 | 3.37  | 0.81      | 0.89 | 1.18 | 0.31           | 0.39 | 0.55 | <b>0.30</b> | <b>0.38</b> | <b>0.52</b> |
| tower                     | 1.91    | 1.97 | 4.47 | 2.15       | 2.05 | 4.51 | 3.13      | 3.54 | 9.87  | 1.26      | 1.69 | 3.06 | 0.47           | 0.84 | 1.65 | <b>0.46</b> | <b>0.78</b> | <b>1.54</b> |
| train                     | 1.5     | 1.41 | 2.37 | 1.59       | 1.44 | 2.51 | 2.01      | 2.03 | 4.1   | 1.09      | 1.14 | 1.61 | 0.51           | 0.66 | 1.01 | <b>0.48</b> | <b>0.64</b> | <b>0.97</b> |
| watercraft                | 1.46    | 1.39 | 2.4  | 1.53       | 1.42 | 2.67 | 2.1       | 2.13 | 4.58  | 1.09      | 1.12 | 1.65 | 0.35           | 0.56 | 0.92 | <b>0.33</b> | <b>0.53</b> | <b>0.89</b> |
| washer                    | 2.42    | 2.31 | 6.08 | 2.92       | 2.53 | 6.53 | 5.55      | 4.11 | 7.04  | 1.72      | 2.05 | 4.19 | 0.64           | 0.91 | 2.04 | <b>0.62</b> | <b>0.88</b> | <b>2.04</b> |
| mean                      | 1.96    | 1.98 | 4.09 | 2.26       | 2.17 | 4.31 | 3.84      | 3.88 | 8.03  | 1.35      | 1.63 | 2.86 | 0.50           | 0.77 | 1.49 | <b>0.43</b> | <b>0.71</b> | <b>1.38</b> |

Table 4: More detailed results on ShapeNet-55. *S.*, *M.* and *H.* stand for the simple, moderate and hard settings.

| CD- $\ell_2(\times 1000)$ | FoldingNet [6] |      |      | InfoCD + FoldingNet |             |             | PoinTr [7] |      |       | InfoCD + PoinTr |             |             |
|---------------------------|----------------|------|------|---------------------|-------------|-------------|------------|------|-------|-----------------|-------------|-------------|
|                           | S.             | M.   | H.   | S.                  | M.          | H.          | S.         | M.   | H.    | S.              | M.          | H.          |
| airplane                  | 1.36           | 1.28 | 1.7  | <b>1.20</b>         | <b>1.26</b> | <b>1.51</b> | 0.27       | 0.38 | 0.69  | <b>0.23</b>     | <b>0.34</b> | <b>0.60</b> |
| trash bin                 | 2.93           | 2.9  | 5.03 | <b>2.13</b>         | <b>2.49</b> | <b>3.91</b> | 0.8        | 1.15 | 2.15  | <b>0.65</b>     | <b>0.96</b> | <b>1.83</b> |
| bag                       | 2.31           | 2.38 | 3.67 | <b>2.10</b>         | <b>2.34</b> | <b>3.05</b> | 0.53       | 0.74 | 1.51  | <b>0.45</b>     | <b>0.66</b> | <b>1.24</b> |
| basket                    | 2.98           | 2.77 | 4.8  | <b>2.22</b>         | <b>2.51</b> | <b>3.85</b> | 0.73       | 0.88 | 1.82  | <b>0.58</b>     | <b>0.73</b> | <b>1.46</b> |
| bathtub                   | 2.68           | 2.66 | 4.0  | <b>2.24</b>         | <b>2.49</b> | <b>3.13</b> | 0.64       | 0.94 | 1.68  | <b>0.52</b>     | <b>0.77</b> | <b>1.43</b> |
| bed                       | 4.24           | 4.08 | 5.65 | <b>3.44</b>         | <b>4.02</b> | <b>5.28</b> | 0.76       | 1.1  | 2.26  | <b>0.62</b>     | <b>0.93</b> | <b>1.91</b> |
| bench                     | 1.94           | 1.77 | 2.36 | <b>1.44</b>         | <b>1.52</b> | <b>2.02</b> | 0.38       | 0.52 | 0.94  | <b>0.33</b>     | <b>0.42</b> | <b>0.81</b> |
| birdhouse                 | 4.06           | 4.18 | 5.88 | <b>3.29</b>         | <b>3.94</b> | <b>5.47</b> | 0.98       | 1.49 | 3.13  | <b>0.79</b>     | <b>1.25</b> | <b>2.60</b> |
| bookshelf                 | 3.04           | 3.03 | 3.91 | <b>2.82</b>         | <b>2.94</b> | <b>3.30</b> | 0.71       | 1.06 | 1.93  | <b>0.59</b>     | <b>0.87</b> | <b>1.65</b> |
| bottle                    | 1.7            | 1.91 | 4.02 | <b>1.29</b>         | <b>1.74</b> | <b>2.43</b> | 0.37       | 0.74 | 1.5   | <b>0.30</b>     | <b>0.59</b> | <b>1.30</b> |
| bowl                      | 2.79           | 2.6  | 4.23 | <b>2.45</b>         | <b>2.56</b> | <b>3.66</b> | 0.68       | 0.78 | 1.44  | <b>0.56</b>     | <b>0.60</b> | <b>1.09</b> |
| bus                       | 1.47           | 1.42 | 2.0  | <b>1.27</b>         | <b>1.30</b> | <b>1.50</b> | 0.42       | 0.55 | 0.79  | <b>0.36</b>     | <b>0.48</b> | <b>0.69</b> |
| cabinet                   | 2.0            | 1.86 | 2.79 | <b>1.49</b>         | <b>1.58</b> | <b>1.97</b> | 0.55       | 0.66 | 1.16  | <b>0.49</b>     | <b>0.57</b> | <b>0.99</b> |
| camera                    | 5.5            | 6.04 | 8.87 | <b>4.94</b>         | <b>6.19</b> | <b>8.35</b> | 1.1        | 2.03 | 4.34  | <b>0.89</b>     | <b>1.71</b> | <b>3.79</b> |
| can                       | 2.84           | 2.68 | 5.71 | <b>1.71</b>         | <b>2.44</b> | <b>3.79</b> | 0.68       | 1.19 | 2.14  | <b>0.54</b>     | <b>1.04</b> | <b>2.02</b> |
| cap                       | 4.1            | 4.04 | 5.87 | <b>2.82</b>         | <b>3.55</b> | <b>7.77</b> | 0.46       | 0.62 | 1.64  | <b>0.34</b>     | <b>0.41</b> | <b>0.94</b> |
| car                       | 1.81           | 1.81 | 2.31 | <b>1.64</b>         | <b>1.73</b> | <b>1.95</b> | 0.64       | 0.86 | 1.25  | <b>0.52</b>     | <b>0.72</b> | <b>1.06</b> |
| cellphone                 | 1.04           | 1.06 | 1.87 | <b>0.76</b>         | <b>0.90</b> | <b>1.12</b> | 0.32       | 0.39 | 0.6   | <b>0.28</b>     | <b>0.32</b> | <b>0.47</b> |
| chair                     | 2.37           | 2.46 | 3.62 | <b>1.93</b>         | <b>2.27</b> | <b>3.07</b> | 0.49       | 0.74 | 1.63  | <b>0.41</b>     | <b>0.62</b> | <b>1.39</b> |
| clock                     | 2.56           | 2.41 | 3.46 | <b>2.07</b>         | <b>2.26</b> | <b>2.85</b> | 0.62       | 0.84 | 1.65  | <b>0.50</b>     | <b>0.69</b> | <b>1.38</b> |
| keyboard                  | 1.21           | 1.18 | 1.32 | <b>1.58</b>         | <b>1.34</b> | <b>1.21</b> | 0.3        | 0.39 | 0.45  | <b>0.32</b>     | <b>0.35</b> | <b>0.43</b> |
| dishwasher                | 2.6            | 2.17 | 3.5  | <b>1.31</b>         | <b>1.48</b> | <b>2.32</b> | 0.55       | 0.69 | 1.42  | <b>0.48</b>     | <b>0.57</b> | <b>1.30</b> |
| display                   | 2.15           | 2.24 | 3.25 | <b>1.72</b>         | <b>2.06</b> | <b>2.77</b> | 0.48       | 0.67 | 1.33  | <b>0.39</b>     | <b>0.53</b> | <b>1.05</b> |
| earphone                  | 6.37           | 6.48 | 9.14 | <b>5.57</b>         | <b>6.64</b> | <b>9.99</b> | 0.81       | 1.38 | 3.78  | <b>0.61</b>     | <b>1.00</b> | <b>2.62</b> |
| faucet                    | 4.46           | 4.39 | 7.2  | <b>4.15</b>         | <b>4.81</b> | <b>6.79</b> | 0.71       | 1.42 | 3.491 | <b>0.63</b>     | <b>1.25</b> | <b>2.85</b> |
| file cabinet              | 2.59           | 2.48 | 3.76 | <b>1.96</b>         | <b>2.13</b> | <b>2.85</b> | 0.63       | 0.84 | 1.69  | <b>0.54</b>     | <b>0.70</b> | <b>1.47</b> |
| guitar                    | 0.65           | 0.6  | 1.25 | <b>0.47</b>         | <b>0.50</b> | <b>0.77</b> | 0.14       | 0.21 | 0.42  | <b>0.12</b>     | <b>0.18</b> | <b>0.34</b> |
| helmet                    | 5.39           | 5.37 | 7.96 | <b>3.99</b>         | <b>4.90</b> | <b>7.64</b> | 0.99       | 1.93 | 4.22  | <b>0.80</b>     | <b>1.48</b> | <b>3.81</b> |
| jar                       | 3.65           | 3.87 | 6.51 | <b>2.98</b>         | <b>3.65</b> | <b>5.44</b> | 0.77       | 1.33 | 2.87  | <b>0.64</b>     | <b>1.07</b> | <b>2.40</b> |
| knife                     | 1.29           | 0.87 | 1.21 | <b>0.72</b>         | <b>0.74</b> | <b>0.85</b> | 0.2        | 0.33 | 0.56  | <b>0.15</b>     | <b>0.27</b> | <b>0.51</b> |
| lamp                      | 3.93           | 4.23 | 6.87 | <b>3.42</b>         | <b>4.29</b> | <b>6.03</b> | 0.64       | 1.4  | 3.58  | <b>0.49</b>     | <b>1.11</b> | <b>2.98</b> |
| laptop                    | 1.02           | 1.04 | 1.96 | <b>0.74</b>         | <b>0.82</b> | <b>1.26</b> | 0.32       | 0.34 | 0.6   | <b>0.28</b>     | <b>0.29</b> | <b>0.49</b> |
| loudspeaker               | 3.21           | 3.15 | 4.55 | <b>2.47</b>         | <b>2.76</b> | <b>3.71</b> | 0.78       | 1.16 | 2.17  | <b>0.63</b>     | <b>0.98</b> | <b>1.86</b> |
| mailbox                   | 2.44           | 2.61 | 4.98 | <b>1.74</b>         | <b>2.10</b> | <b>3.86</b> | 0.39       | 0.78 | 2.56  | <b>0.30</b>     | <b>0.61</b> | <b>2.35</b> |
| microphone                | 4.42           | 5.06 | 7.04 | <b>3.90</b>         | <b>5.48</b> | <b>7.02</b> | 0.7        | 1.66 | 4.48  | <b>0.54</b>     | <b>1.45</b> | <b>3.40</b> |
| microwaves                | 2.67           | 2.48 | 4.43 | <b>1.83</b>         | <b>1.99</b> | <b>3.07</b> | 0.67       | 0.83 | 1.82  | <b>0.59</b>     | <b>0.72</b> | <b>1.58</b> |
| motorbike                 | 2.63           | 2.55 | 3.52 | <b>2.70</b>         | <b>2.82</b> | <b>3.31</b> | 0.75       | 1.1  | 1.92  | <b>0.57</b>     | <b>0.91</b> | <b>1.54</b> |
| mug                       | 3.66           | 3.67 | 5.7  | <b>2.95</b>         | <b>3.53</b> | <b>5.09</b> | 0.91       | 1.17 | 2.35  | <b>0.79</b>     | <b>0.96</b> | <b>1.93</b> |
| piano                     | 3.86           | 4.04 | 6.04 | <b>3.19</b>         | <b>3.69</b> | <b>5.22</b> | 0.76       | 1.06 | 2.23  | <b>0.61</b>     | <b>0.87</b> | <b>1.74</b> |
| pillow                    | 2.33           | 2.38 | 3.87 | <b>1.78</b>         | <b>1.95</b> | <b>2.94</b> | 0.61       | 0.82 | 1.56  | <b>0.48</b>     | <b>0.65</b> | <b>1.20</b> |
| pistol                    | 1.92           | 1.62 | 2.52 | <b>1.52</b>         | <b>1.55</b> | <b>2.04</b> | 0.43       | 0.66 | 1.3   | <b>0.35</b>     | <b>0.57</b> | <b>0.97</b> |
| flowerpot                 | 4.53           | 4.68 | 6.46 | <b>4.21</b>         | <b>4.67</b> | <b>5.92</b> | 1.01       | 1.51 | 2.77  | <b>0.83</b>     | <b>1.23</b> | <b>2.33</b> |
| printer                   | 3.66           | 4.01 | 5.34 | <b>3.05</b>         | <b>3.87</b> | <b>4.81</b> | 0.73       | 1.21 | 2.47  | <b>0.65</b>     | <b>1.04</b> | <b>2.16</b> |
| remote                    | 1.14           | 1.2  | 1.98 | <b>0.91</b>         | <b>1.03</b> | <b>1.18</b> | 0.36       | 0.53 | 0.71  | <b>0.28</b>     | <b>0.40</b> | <b>0.57</b> |
| rifle                     | 1.27           | 1.02 | 1.37 | <b>1.03</b>         | <b>1.04</b> | <b>1.27</b> | 0.3        | 0.45 | 0.79  | <b>0.26</b>     | <b>0.39</b> | <b>0.67</b> |
| rocket                    | 1.37           | 1.18 | 1.88 | <b>0.97</b>         | <b>1.20</b> | <b>1.46</b> | 0.23       | 0.48 | 0.99  | <b>0.19</b>     | <b>0.42</b> | <b>0.90</b> |
| skateboard                | 1.58           | 1.58 | 2.07 | <b>1.31</b>         | <b>1.40</b> | <b>1.80</b> | 0.28       | 0.38 | 0.62  | <b>0.23</b>     | <b>0.32</b> | <b>0.51</b> |
| sofa                      | 2.22           | 2.09 | 3.14 | <b>1.71</b>         | <b>1.80</b> | <b>2.39</b> | 0.56       | 0.67 | 1.14  | <b>0.49</b>     | <b>0.58</b> | <b>1.00</b> |
| stove                     | 2.69           | 2.63 | 3.99 | <b>1.96</b>         | <b>2.23</b> | <b>2.99</b> | 0.63       | 0.92 | 1.73  | <b>0.53</b>     | <b>0.80</b> | <b>1.52</b> |
| table                     | 2.23           | 2.15 | 3.21 | <b>1.78</b>         | <b>1.95</b> | <b>2.60</b> | 0.46       | 0.64 | 1.31  | <b>0.41</b>     | <b>0.55</b> | <b>1.12</b> |
| telephone                 | 1.07           | 1.06 | 1.75 | <b>0.76</b>         | <b>0.88</b> | <b>1.09</b> | 0.31       | 0.38 | 0.59  | <b>0.28</b>     | <b>0.32</b> | <b>0.50</b> |
| tower                     | 2.46           | 2.45 | 3.91 | <b>2.45</b>         | <b>2.46</b> | <b>3.47</b> | 0.55       | 0.9  | 1.95  | <b>0.45</b>     | <b>0.76</b> | <b>1.67</b> |
| train                     | 1.86           | 1.68 | 2.32 | <b>1.58</b>         | <b>1.61</b> | <b>1.81</b> | 0.5        | 0.7  | 1.12  | <b>0.39</b>     | <b>0.60</b> | <b>1.03</b> |
| watercraft                | 1.85           | 1.69 | 2.49 | <b>1.55</b>         | <b>1.67</b> | <b>2.10</b> | 0.41       | 0.62 | 1.07  | <b>0.34</b>     | <b>0.55</b> | <b>0.93</b> |
| washer                    | 3.47           | 3.2  | 4.89 | <b>2.44</b>         | <b>2.60</b> | <b>3.62</b> | 0.75       | 1.06 | 2.44  | <b>0.62</b>     | <b>0.89</b> | <b>2.02</b> |
| mean                      | 2.68           | 2.66 | 4.06 | <b>2.17</b>         | <b>2.50</b> | <b>3.46</b> | 0.58       | 0.88 | 1.79  | <b>0.47</b>     | <b>0.73</b> | <b>1.50</b> |

## References

- [1] Wentao Yuan, Tejas Khot, David Held, Christoph Mertz, and Martial Hebert. Pcn: point completion network. In *3DV*, 2018.
- [2] Lyne P. Tchapmi, Vineet Kosaraju, Hamid Reza Tofighi, Ian Reid, and Silvio Savarese. Topnet: Structural point cloud decoder. In *CVPR*, 2019.
- [3] Zitian Huang, Yikuan Yu, Jiawen Xu, Feng Ni, and Xinyi Le. Pf-net: Point fractal network for 3d point cloud completion. In *CVPR*, 2020.
- [4] Haozhe Xie, Hongxun Yao, Shangchen Zhou, Jiageng Mao, Shengping Zhang, and Wenxiu Sun. Grnet: Gridding residual network for dense point cloud completion. In *ECCV*, 2020.
- [5] Haoran Zhou, Yun Cao, Wenqing Chu, Junwei Zhu, Tong Lu, Ying Tai, and Chengjie Wang. Seedformer: Patch seeds based point cloud completion with upsample transformer. *arXiv preprint arXiv:2207.10315*, 2022.
- [6] Yaoqing Yang, Chen Feng, Yiru Shen, and Dong Tian. Foldingnet: Point cloud auto-encoder via deep grid deformation. In *Proceedings of the IEEE conference on computer vision and pattern recognition*, pages 206–215, 2018.
- [7] Xumin Yu, Yongming Rao, Ziyi Wang, Zuyan Liu, Jiwen Lu, and Jie Zhou. Pointr: Diverse point cloud completion with geometry-aware transformers. In *ICCV*, 2021.
